# Supplementary material for: Synergistic Effects of Localized Surface Plasmon Resonance, Surface Plasmon Polariton, and Waveguide Plasmonic Resonance on the Same Material: A Promising Hypothesis to Enhance Organic Solar Cell Efficiency
Source: MDPI journal article supplement (doi:10.3390/nano13152209), 2023-07-29
Supplement: s1 [file s1]

## Supplementary Information:

*Article*

# **Synergistic Effects of Localized Surface Plasmon Resonance, Surface Plasmon Polariton, and Waveguide Plasmonic Resonance on the Same Material: A Promising Hypothesis to Enhance Organic Solar Cell Efficiency**

**Issoufou Ibrahim Zamkoye \*, Bruno Lucas and Sylvain Vedraine \***

University of Limoges, Centre National de la Recherche Scientifique, XLIM, UMR 7252,  
F-87000 Limoges, France; bruno.lucas@unilim.fr

\* Correspondence: issoufou.ibrahim@etu.unilim.fr (I.I.Z.);  
sylvain.vedraine@unilim.fr (S.V.)

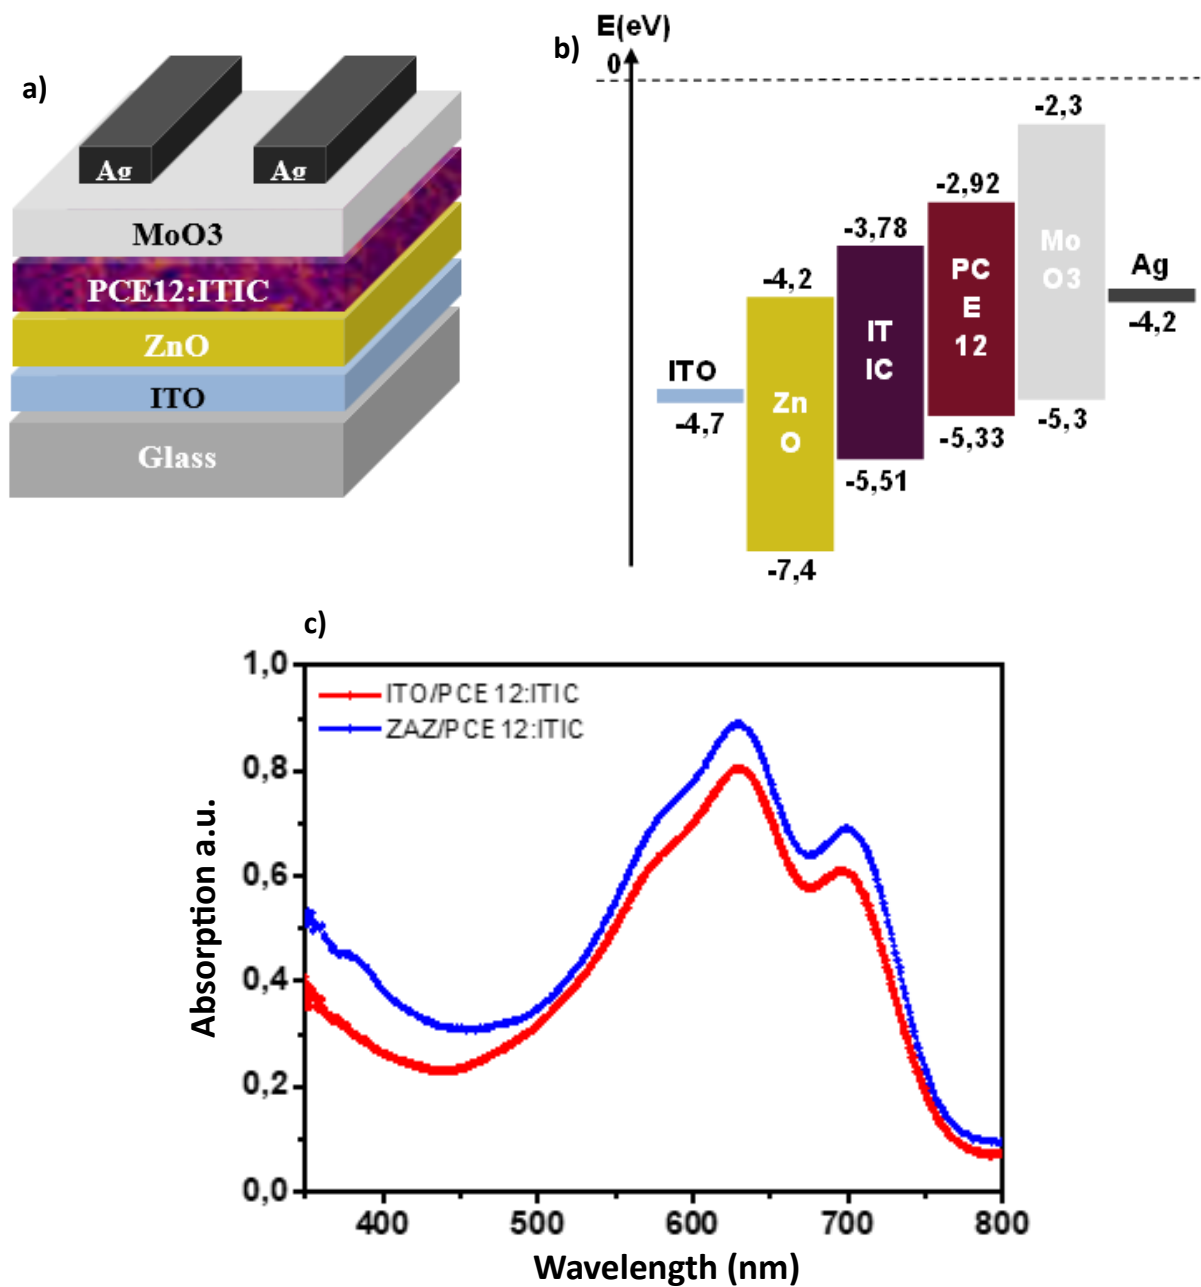

**Figure S1:** a. configuration of the solar cell with the different interface layers, b. energy level of the materials used in the device [1], c. absorption curves for the active layer (210 nm) on ZAZ and ITO.

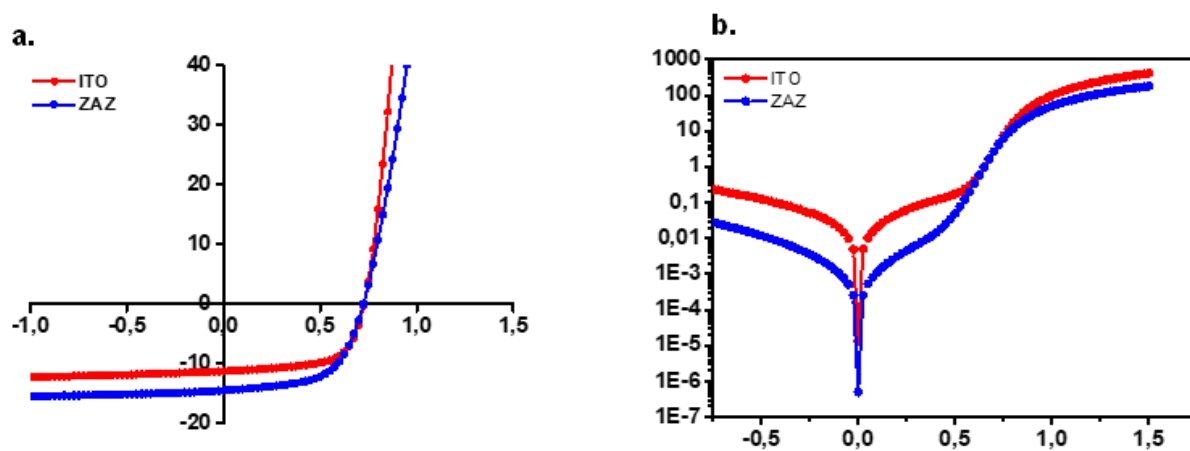

**Figure S2:**  $J(V)$  curves for PF2:PC71BM(500nm) solar cells a. under solar simulator ( $100\text{mW.cm}^{-2}$ ) ; b. in dark conditions.

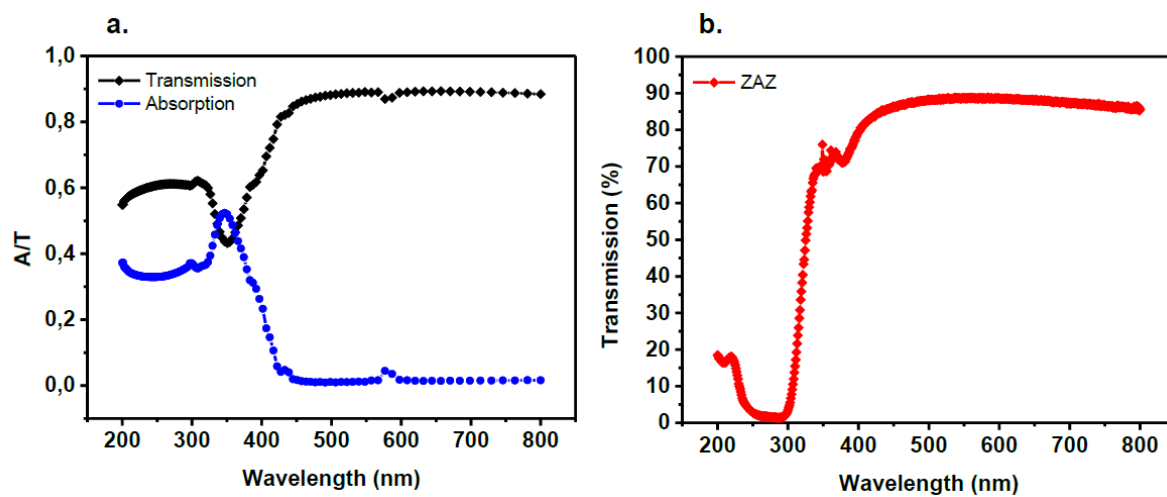

**Figure S3:** a. Absorption and transmission curves of a ZAZ electrode modeled with 5 AgNWs; b. transmission curve of an experimental ZAZ electrode.

## References

1. W. Zhao, D. Qian, S. Zhang, S. Li, O. Inganäs, F. Gao, and J. Hou, Fullerene-Free Polymer Solar Cells with over 11% Efficiency and Excellent Thermal Stability, *Adv. Mater.*, vol. 28, n° 23, p. 4734-4739, **2016**, doi:0.1002/adma.201600281.
